# Supplementary material for: Fluorescence turn-on assay for glutathione reductase activity based on a conjugated polyelectrolyte with multiple carboxylate groups
Source: Royal Society of Chemistry journal article supplement (doi:10.1039/c0jm02400g), 2010-01-01
Supplement: c0jm02400g.pdf [file c0jm02400g.pdf]

*Electronic Supplementary Information (ESI):*

# Fluorescence Turn-on Assay for Glutathione Reductase Activity Based on a Conjugated Polyelectrolyte with Multiple Carboxylate Groups

*Hongliang Fan, Tao Zhang\*, Shaowu Lv, and Qinhan Jin*

**General Information:** The dicarboxylate CPE, PPE-OBS was obtained according to a previously reported procedure.<sup>[1,2]</sup> Mass spectra were recorded with an Analytica of Branford ESI-TOF mass spectrometer. All fluorescence experiments were carried out at ambient temperature using a Shimadzu RF-5301 spectrometer equipped with a Xeron-lamp excitation source. Unless otherwise specified, the excitation wavelength was 400 nm, and the “fluorescence intensity” referred to the maximum emission of PPE-(COOK)<sub>4</sub> at 510 nm

## 1. ESI-MS characterization of monomer 2 and 3

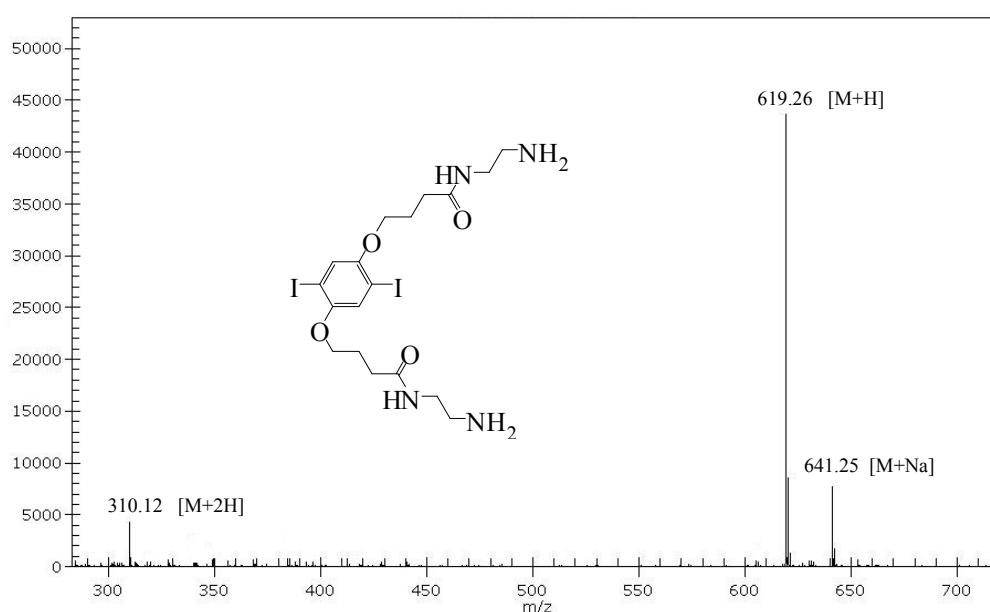

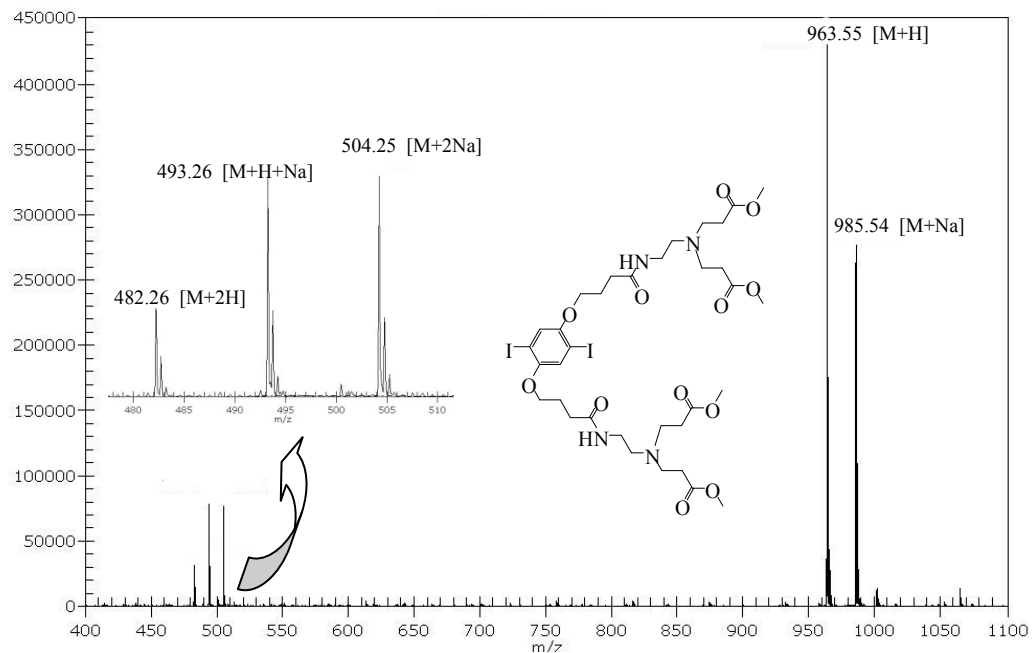

Fig. S1. ESI-MS spectra of monomer 2 and 3

## 2. Fluorescence quenching of PPE-(COOK)<sub>4</sub> and PPE-OBS caused by methyl viologen (MV<sup>2+</sup>)

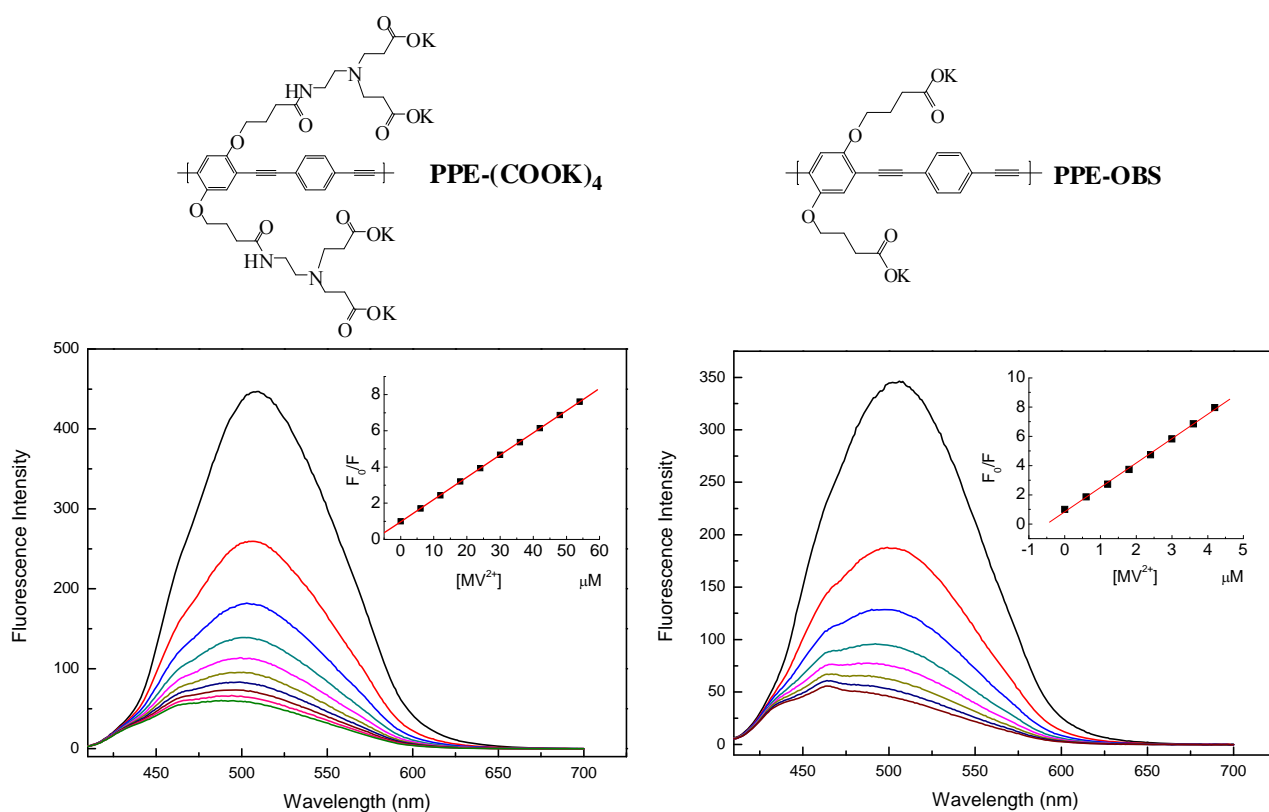

Fig. S2. Fluorescence quenching of PPE-(COOK)<sub>4</sub> (Left) and PPE-OBS (Right) caused by MV<sup>2+</sup>. The obtained  $K_{SV}$  values are  $1.2 \times 10^5$  and  $1.6 \times 10^6 \text{ M}^{-1}$ , respectively;  $[\text{PPE}-(\text{COOK})_4] = [\text{PPE-OBS}] = 5 \text{ } \mu\text{M}$ .

### 3. Quenching efficiencies of PPE-(COOK)<sub>4</sub> and PPE-OBS caused by Cu<sup>2+</sup>

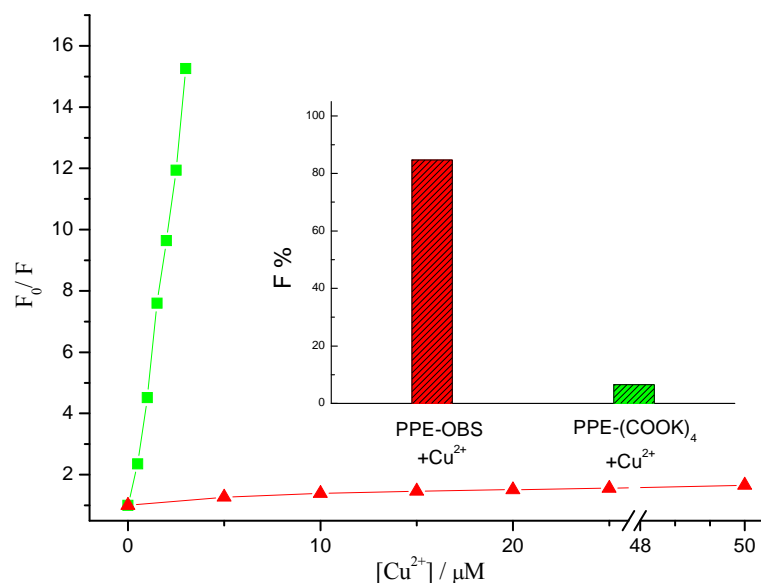

Fig. S3 Cu<sup>2+</sup>-induced fluorescence quenching of PPE-(COOK)<sub>4</sub> (squares) and PPE-OBS (triangles) in PBS (10 mM, pH 7.4), [PPE-(COOK)<sub>4</sub>] = [PPE-OBS] = 5 μM. Inset: Comparison of the quenching efficiencies at the same concentration of Cu<sup>2+</sup> (3 μM).

### 4. Fluorescence superquenching of PPE-(COOK)<sub>4</sub> by Cu<sup>2+</sup>

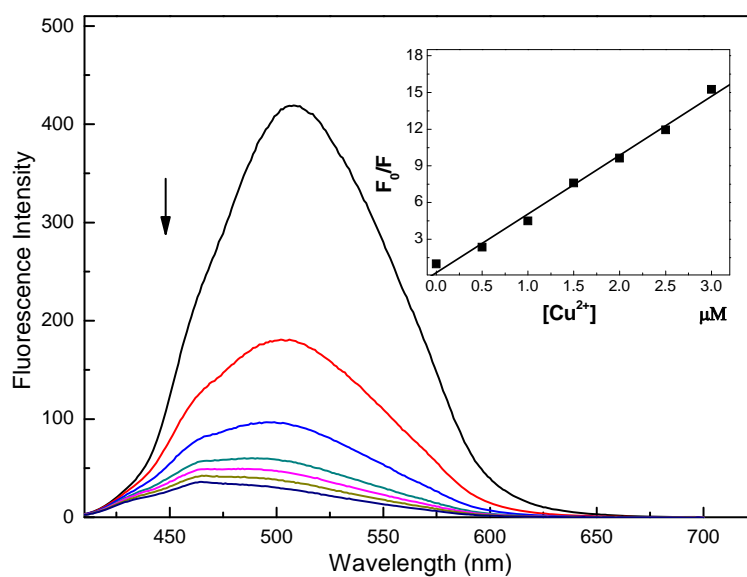

Fig. S4 Fluorescence spectral changes of PPE-(COOK)<sub>4</sub> (5 μM) in PBS (10 mM, pH 7.4) upon the addition of Cu<sup>2+</sup> (Inset: Emission intensity at 510 nm as a function of [Cu<sup>2+</sup>];  $K_{SV}=4.8 \times 10^6 \text{ M}^{-1}$ ,  $R=0.995$ ).

## 5. Fluorescence turn-on of PPE-(COOK)<sub>4</sub>/Cu<sup>2+</sup> caused by GSH

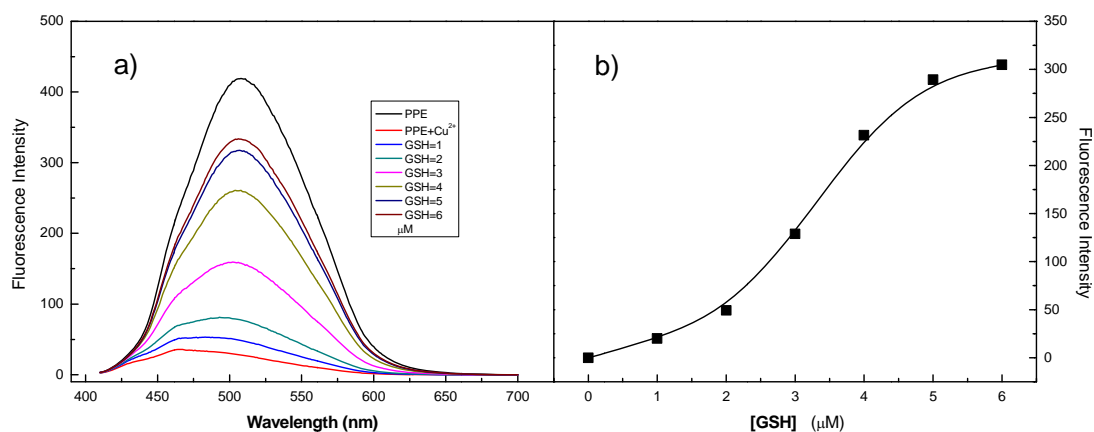

Fig. S5 a) Evolution of the fluorescence spectra of PPE-(COOK)<sub>4</sub>/Cu<sup>2+</sup> (5 μM/3 μM) upon the addition of GSH; b)

Emission intensity of PPE-(COOK)<sub>4</sub>/Cu<sup>2+</sup> (5 μM/3 μM) at 510 nm as a function of [GSH].

## 6. Effects of various proteins/enzymes on the emission of PPE-(COOK)<sub>4</sub>

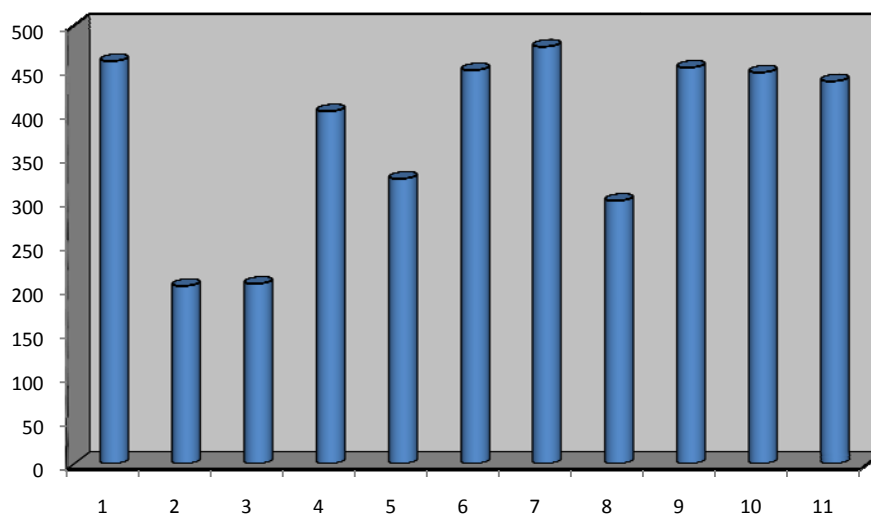

Fig. S6 Effects of various proteins/enzymes (10 μg/mL) on the emission of PPE-(COOK)<sub>4</sub> (5 μM). From left to right are Blank, Histone, Cytochrome C, Hemoglobin, BSA, Avidin, Trypsin, Lysozyme, Elastase, Thrombin and Papain, respectively.

## References

- 1) T. Zhang, H. L. Fan, J. G. Zhou and Q. H. Jin, *J. Polym. Sci., Part A: Polym. Chem.*, 2009, **47**, 3056.
- 2) I. B. Kim, A. Dunkhorst, J. Gilbert and U. H. F. Bunz, *Macromolecules* 2005, **38**, 4560.
